# Supplementary material for: SerpinB2 Protection of Retinoblastoma Protein from Calpain Enhances Tumor Cell Survival
Source: Oxford University Press journal article supplement (doi:10.1158/0008-5472.can-07-5850), 2008-07-15
Supplement: 00085472can075850-sup-can-07-5850r1-smaterials_fig_1.pdf [file 00085472can075850-sup-can-07-5850r1-smaterials_fig_1.pdf]

## Online Supplementary Material

### Supplementary Materials and Methods

#### Oligonucleotide Primer Sequences:

##### **Rb(K810W) mutant**

Forward 5'-GAACATCTATATTTACCCCCTGTGGAGTCCATATAAAAATTTTCAGAAGGTC-3'

Reverse 5'-GACCTTCTGAAATTTTATATGGACTCCACAGGGGTGAAATATAGATGTTC-3'

##### **ChIP Assay**

| Promoter       | Forward                           | Reverse                           |
|----------------|-----------------------------------|-----------------------------------|
| casp-7         | 5'-TTTGGGTCACTTGGAGCGCG-3'        | 5'-AAGAGCCCAAAGCGACCCGT-3'        |
| cyclin A       | 5'-TACTTGAAGTCAAGAACAGCCGCGCTC-3' | 5'-GATCAGCCTGCGGCGCCAAGCAGCGT-3'  |
| TK             | 5'-TCCCGGATTCTCCACGAG-3'          | 5'-TGCGCTCCGGGAAGTTCAC-3'         |
| p21            | 5'-GGGTGTAGGGAGATTGGTTCAATG-3'    | 5'-CCGCTGACCCACTCTGGCAGGC-3'      |
| p73            | 5'-CTCTGCCGAAGATCGCGGTCCG-3'      | 5'-GGCCGCGTCCAAGTCGGGGTCC-3'      |
| CDC2           | 5'-GCTTGCGCTCGCACTCAGTTGGCG-3'    | 5'-AGTGCGAGCAGTTTCAAACCTCAC-3'    |
| CDC25A         | 5'-TCTGCTGGGAGTTTTCATTGACCTC-3'   | 5'-TTGGCGCCAAACGGAATCCACCCAATC-3' |
| $\beta$ -actin | 5'-ACGCCAAAACCTCTCCCTCCTCCTC-3'   | 5'-CATAAAAGGCAACTTTCGGAACGGC-3'   |

#### Assay of Calpain Activity

For assay of calpain activity, Calpain-1 (50 nM) in the presence or absence of calpastatin (from 10-500 nM) or SerpinB2 (from 10-500 nM) were incubated with 100  $\mu$ M fluorogenic peptide substrate (Suc-Leu-Tyr-AMC)(Calbiochem) in 25 mM Hepes pH 7.5, 100 mM NaCl, 0.5 mM DTT and 4 mM  $\text{CaCl}_2$  at 35°C over a 20-min period. Changes in fluorescence at 460 nm were monitored with time on a PerkinElmer Life Sciences HTS 7000 BioAssay Reader. Assays were performed in triplicate. Initial rates were measured for each inhibitor concentration.

## Supplementary Figure 1

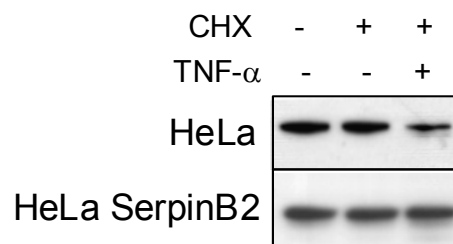

**Figure S1. SerpinB2 protects HeLa cells from the loss of Rb during initiation of TNF $\alpha$  induced apoptosis.** HeLa and HeLa expressing SerpinB2 (S1a) (18) cells were treated with CHX alone or in combination with 1 ng/ml of TNF $\alpha$  for 3 hrs. Cell lysates were immunoblotted for Rb using Rb(G3-245) and exposed to detect Rb signals (the HeLa blot is a 10x longer exposure than HeLa SerpinB2). Signals were analyzed by densitometry and values normalized to GAPDH. Densitometric analysis of the blots reveal a 45% decrease in full length Rb in TNF/CHX treated HeLa cells relative to HeLa cells treated with CHX alone, whereas Rb is stabilized in the presence of SerpinB2.

## Supplementary Figure 2

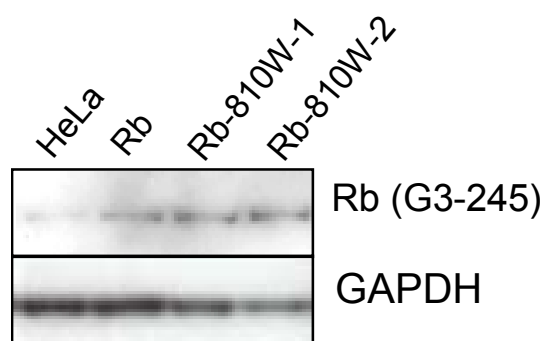

**Figure S2.** HeLa cells were transfected with plasmids encoding wild type Rb (Rb) or the Rb-810W calpain cleavage site mutant, and stable clones isolated. Lysates of untransfected HeLa cells, one wild type Rb clone and two Rb-810W clones were immunoblotted for Rb and GAPDH. A higher level of both wild type Rb and the Rb-810W mutant is detected compared to untransfected HeLa cells.
